# Supplementary material for: Free Tax Services in Pediatric Clinics
Source: Oxford University Press journal article supplement (doi:10.1542/peds.2017-3608), 2018-05-18
Supplement: peds_20173608supplementarydata.doc [file peds_20173608supplementarydata.doc]

**Appendix 1. Surveys**

**Client Survey 2017**

Date: ______________

**Consent Statement:** Thank you for using our tax services today. This survey is a research study. Its purpose is to help us better understand your experience with our services so that we can make them better for next year. It should take about 15 minutes. This survey is anonymous (your name will not be used) and confidential. Your information won’t be shared with anyone else in a way that could identify you. Your participation is voluntary. You don’t have to answer any questions that you don’t want to answer. You can just skip these questions. Your participation will not affect your medical care or your tax return. If you have questions, you can contact Lucy Marcil, MD at [lucy.marcil@bmc.org](mailto:lucy.marcil@bmc.org) or at (XXX) XXX-XXXX. Thank you for your time!

**OVERALL EXPERIENCE:**

1. How was your experience with your tax services today?

☐ Excellent ☐ Very good ☐ Good ☐ Fair ☐ Poor

1. Would you want your taxes done here next year?

☐ Yes ☐ No ☐ Not sure

**ABOUT YOUR TAX SERVICES TODAY:**

1. Rate your level of agreement with the following statements:

|  | **Definitely agree** | **Mostly**  **agree** | **Mostly**  **disagree** | **Definitely disagree** |
| --- | --- | --- | --- | --- |
| 1. I was satisfied with the amount of time it took to do my taxes here. | 1 | 2 | 3 | 4 |
| 1. There was enough privacy where my taxes were prepared. | 1 | 2 | 3 | 4 |
| 1. My tax preparers were knowledgeable about taxes. | 1 | 2 | 3 | 4 |
| 1. The location is convenient | 1 | 2 | 3 | 4 |
| 1. I trust the tax preparers here. | 1 | 2 | 3 | 4 |
| 1. Getting tax services done at my clinic/hospital makes me feel connected to my doctor. | 1 | 2 | 3 | 4 |

**ABOUT YOUR TAX DATA:**

The next questions are about your tax returns in 2016 and 2017. We are asking to learn how we can best help your family with your taxes. Your information is anonymous (we won’t ask your name) and confidential.

1. How many people live in your household? (*The children do not have to be biologically yours. They can be adopted, foster, grandchild, or a relative if they live with you and you claim them on your taxes.)*

Total number (including you): _____________

Number of children: __________ Ages of children: ___________________

1. What is your job title? __________________________
2. About what was your household’s weekly income last year? Income means money you get from a job, from your own business, pensions, unemployment insurance, cash benefits from assistance programs, alimony or child support. Do not include non-cash benefits like SNAP (food stamps).

☐ No income

☐ < $230 (< $11,880/year)

☐ $230 - $309 ($11,880 - $16,019/year)

☐ $310 - $389 ($16,020 - $20,159/year)

☐ $390 - $469 ($20,160 - $24,299/year)

☐ $470 - $549 ($24,300 - $28,439/year)

☐ $550 - $629 ($28,440 - $32,579/year)

☐ $630 - $709 ($32,580 - $36,729/year)

☐ $710 - $789 ($36,730 - $40,889/year)

☐ ≥ $780 per week (≥ $40,890/year)

☐ Not sure

1. Last year, who did your taxes?

☐ Self or family member for free

☐ Paid tax preparation (H&R Block, Liberty Tax, private accountant/lawyer, etc.)

☐ StreetCred (free tax site) at Boston Medical Center

☐ Another free tax site (VITA)

☐ Did not file taxes

☐ Not sure

1. **If you paid to have your taxes done last year**, how much did you pay? _____________
2. **If you did not file taxes last year**, why not? Please check all that apply. Again, this is confidential. We won’t share your answer with anyone else.

☐ No income

☐ Not enough time

☐ Concern about immigration status

☐ Didn’t know how

☐ Other (please describe): ________

1. Have you ever used a free tax preparation service? ☐ Yes ☐ No
2. **If you haven’t used a free tax preparation site in the past,** why not? Please check all that apply.

☐ Didn’t know it existed

☐ Couldn’t get there

☐ Couldn’t go when it was open

☐ I prefer to use a paid service

☐ I don’t need help with my taxes

☐ Other (please describe): _____________

1. Have you heard of the Earned Income Tax Credit (EITC)?

☐ Yes; I learned about it today.

☐ Yes; I knew about it before today.

☐ No

☐ Not sure

The Earned Income Tax Credit is a government program that gives money to people who work based on how much money they make and how many kids they have.

1. Did you get the Earned Income Tax Credit last year (2016)?

☐ Yes ☐ No ☐ Not sure

1. How long (in hours or minutes) did it take to get your taxes done with us this tax season? ____________
2. How many times did you visit this site to finish your taxes? __________

**OTHER SERVICES:**

1. Did you get help enrolling in SNAP or FAFSA with StreetCred?

☐ Yes, SNAP ☐ Yes, FAFSA ☐ No

1. If you **did** get help enrolling in SNAP or FAFSA, would you recommend it to a friend?

☐ Yes ☐ No

1. If you **did not** get help enrolling in SNAP or FAFSA, would you like help with either of these services in the future?

☐ Yes ☐ No ☐ I don’t know what these are

1. StreetCred may offer help enrolling in other programs using the information you have already collected for your tax return in the future. Please check all programs that you would like help enrolling in:

☐ WIC ☐ Head Start ☐ Social Security ☐ Child Care ☐ Housing subsidies

☐ TANF ☐ Medicaid ☐ Utility protection ☐ Supplemental Security Income (SSI)

☐ Other: __________________________________

**ABOUT YOU:**

1. Did you or your child have a doctor’s appointment today?

☐ Yes, I did ☐ Yes, my child did ☐ No

1. How are you connected to Boston Medical Center? Please check all that apply.

☐ Parent of Pediatric patient

☐ Family Medicine patient

☐ OB/GYN patient

☐ Other patient

☐ BMC employee

☐ No connection

1. How old are you?
2. Do you consider yourself Hispanic or Latino/a? ☐ Yes ☐ No
3. What is your race? Please check all that apply.

☐ American Indian/Alaskan Native

☐ Asian

☐ Black/African American

☐ Native Hawaiian/Pacific Islander

☐ White, not of Hispanic origin

☐ Other (describe): _____________

1. What is the highest level of education you have completed?

☐ Did not complete high school

☐ High school graduate, GED, or equivalent

☐ Some college or technical school

☐ College degree or higher

1. What is your martial status?

☐ Single (living alone) ☐ Married ☐ Widowed

☐ Living as a couple ☐ Divorced

1. What is your primary language? (e.g. language you are most comfortable speaking)

☐ English ☐ Spanish ☐ Haitian Creole ☐ Other (describe): _____________

You have completed the survey! Thank you for your time!

**Staff Survey**

**Consent Statement:** Thank you for taking the time to answer a few questions about StreetCred. This survey is a research study and should only take 5 minutes to complete. Your participation in this study is voluntary. Your answers to these questions are confidential and anonymous. No one will be able to link your answer back to you. We’re only asking these questions to help us better understand how to help our clinic families. If you have questions, you can contact Lucy Marcil, MD at [lucy.marcil@bmc.org](mailto:lucy.marcil@bmc.org). Thank you for your time!

1. Are you aware of the StreetCred program that was implemented this year at the BMC pediatric clinic? StreetCred provides free tax preparation services to families whose children use BMC for pediatric primary care.

Yes  If yes, complete the following survey

No  If not, do not compete the survey

1. What is your role in the BMC Clinic?

Administrator

Nurse

Clinical Assistant

Physician

Social Worker

Patient Navigator

Volunteer

Nurse practitioner

1. How did StreetCred impact your ability to do your job and your work flow?

Very positively impacted my ability to do my job and my work flow

Positively impacted my ability to do my job and my work flow

Did not impact my ability to do my job and did not impact my work flow

Negatively impacted my ability to do my job and my work flow

Very negatively impacted my ability to do my job and my work flow

1. Do you think free tax preparation is an appropriate and relevant service to provide to clinic families? Why or why not?

Yes No

1. Please describe a positive interaction you had with the StreetCred program
2. Please describe a negative interaction you had with the StreetCred program.
3. Do you think BMC Pediatric Clinic should provide tax preparation services for clinic families again next year?

Yes No

1. If StreetCred were to happen at BMC clinic again next year, what would you change about the program or the implementation of the program? Free response.

**Non-participant Survey**

Date: ______________

**Consent Statement:** Thank you for answering our three quick questions. This survey is a research study. Its purpose is to help us better understand your experience with our services so that we can make them better for next year. If you don’t want to answer any question, that’s okay, you can skip it. These questions are confidential. We won’t share your answer with anyone else in a way that could identify you. We’re only asking this to help us better understand what services would be useful to you. As a thank you for doing the survey, you can enter a raffle for gift cards (One $75 prize; Five $15 prizes). If you have questions, you can contact Lucy Marcil, MD at [lucy.marcil@bmc.org](mailto:lucy.marcil@bmc.org). Thank you for your time!

1. You chose not to participate in StreetCred, which provides free tax services to families at the BMC Pediatric Clinic. Why not? Please choose all that apply.

☐ I didn’t have enough time that day.

☐ I did not have the necessary paper work.

☐ I prepare my own taxes.

☐ My taxes are prepared for free elsewhere.

☐ I pay to prepare my taxes and do not wish to have them prepared for free.

☐ I didn’t understand the service StreetCred offers.

☐ I do not think taxes should be prepared in the healthcare setting.

☐ I am not employed nor is my spouse employed.

☐ I am working but my work is not reported to the government.

☐ I am an immigrant and do not have work papers.

☐ I don’t remember being offered this service.

☐ Other. Please explain: __________________________________________________

☐ Do not wish to answer.

1. If you had another opportunity, would you like to use StreetCred’s services in the future?

☐ Yes

☐ No

☐ Not sure

Why or why not? _________________________________________________________

☐ Do not wish to answer.

1. If you filed taxes last year, did you receive the Earned Income Tax Credit?

☐ Yes

☐ No

☐ I don’t know

☐ Do not wish to answer.
